# Supplementary material for: Identification of Aniline-Degrading Bacteria Using Stable Isotope Probing Technology and Prediction of Functional Genes in Aerobic Microcosms
Source: MDPI journal article supplement (doi:10.3390/catal14010064), 2024-01-15
Supplement: s1 [file s1]

## Supporting Information

**Table S1.** Microbial community composition at genus level in samples of different treatment groups (Top 11).

| Treatments              | Fir-Hea             |                     | Fir-Lig             |                     | Sec-Hea             |                     | Sec-Lig             |                     |
|-------------------------|---------------------|---------------------|---------------------|---------------------|---------------------|---------------------|---------------------|---------------------|
| Samples                 | LJ-45h-<br>13C-1-10 | LJ-45h-<br>13C-2-09 | LJ-45h-<br>12C-1-14 | LJ-45h-<br>12C-2-14 | LJ-96h-<br>13C-1-09 | LJ-96h-<br>13C-2-10 | LJ-96h-<br>12C-1-15 | LJ-96h-<br>12C-2-16 |
| <i>Acinetobacter</i>    | 30.13%              | 42.08%              | 2.47%               | 1.36%               | 4.80%               | 4.89%               | 0.54%               | 7.25%               |
| <i>Aquabacterium</i>    | 0.65%               | 1.01%               | 5.98%               | 5.71%               | 0.55%               | 0.27%               | 4.91%               | 3.43%               |
| <i>Arenimonas</i>       | 0.72%               | 0.27%               | 1.04%               | 0.43%               | 1.89%               | 3.67%               | 1.54%               | 0.46%               |
| <i>Dechloromonas</i>    | 0.96%               | 1.58%               | 10.27%              | 6.64%               | 1.04%               | 0.74%               | 9.40%               | 5.94%               |
| <i>Hydrogenophaga</i>   | 2.37%               | 1.36%               | 0.47%               | 0.39%               | 4.62%               | 5.82%               | 1.85%               | 1.10%               |
| <i>Novosphingobium</i>  | 5.31%               | 1.64%               | 6.16%               | 2.37%               | 2.44%               | 6.69%               | 4.19%               | 3.10%               |
| <i>Others</i>           | 34.88%              | 24.05%              | 29.83%              | 35.51%              | 20.54%              | 20.51%              | 25.22%              | 31.02%              |
| <i>Phenylobacterium</i> | 0.80%               | 0.54%               | 2.32%               | 2.02%               | 0.57%               | 0.36%               | 1.59%               | 1.23%               |
| <i>Prostheco bacter</i> | 0.14%               | 0.05%               | 0.61%               | 0.20%               | 14.73%              | 17.96%              | 3.70%               | 1.97%               |
| <i>Pseudomonas</i>      | 2.79%               | 1.65%               | 2.18%               | 0.92%               | 1.03%               | 1.19%               | 0.38%               | 0.06%               |
| <i>Unassigned</i>       | 19.74%              | 23.13%              | 38.34%              | 44.07%              | 29.30%              | 24.08%              | 42.05%              | 43.43%              |
| <i>Zoogloea</i>         | 1.49%               | 2.63%               | 0.32%               | 0.38%               | 18.50%              | 13.80%              | 4.62%               | 1.00%               |
